# Supplementary material for: Effectiveness of a Walking Program Involving the Hybrid Assistive Limb Robotic Exoskeleton Suit for Improving Walking Ability in Stroke Patients: Protocol for a Randomized Controlled Trial
Source: PubMed Central journal article supplement (PMC6913690; doi:10.2196/14001), 2019-10-11
Supplement: resprot_v8i10e14001_app1.pdf [file resprot_v8i10e14001_app1.pdf]

Table 1. Assessment schedule.

| Assessment                                                                 | Baseline | Preintervention observation (weeks) |   |   |   |   |   |                  |     |     |     |     |     |                |          | Intervention (weeks) |   |   |   |   | Postintervention observation (weeks) |   |
|----------------------------------------------------------------------------|----------|-------------------------------------|---|---|---|---|---|------------------|-----|-----|-----|-----|-----|----------------|----------|----------------------|---|---|---|---|--------------------------------------|---|
|                                                                            |          | 1                                   | 2 | 3 | 4 | 5 | 6 | • • <sup>a</sup> | X-5 | X-4 | X-3 | X-2 | X-1 | X <sub>b</sub> | Baseline | 1                    | 2 | 3 | 4 | 5 | 1                                    | 2 |
| Maximum walking speed (MWS) on the 10-m walk test                          | ✓        | ✓                                   | ✓ | ✓ | ✓ | ✓ | ✓ | ✓                | ✓   | ✓   | ✓   | ✓   | ✓   | ✓              | ✓        | ✓                    | ✓ | ✓ | ✓ | ✓ | ✓                                    | ✓ |
| Mean step length and average step rate at MWS                              |          |                                     |   |   |   |   |   |                  |     |     |     |     |     |                | ✓        | ✓                    | ✓ | ✓ | ✓ | ✓ | ✓                                    | ✓ |
| Single-leg support time expressed as a percentage of the gait cycle at MWS |          |                                     |   |   |   |   |   |                  |     |     |     |     |     |                | ✓        |                      |   |   |   | ✓ |                                      | ✓ |
| Maximum distance walked within the span of 6 min (6-min walk test)         |          |                                     |   |   |   |   |   |                  |     |     |     |     |     |                | ✓        |                      |   |   |   | ✓ |                                      | ✓ |
| Functional ambulation category                                             |          |                                     |   |   |   |   |   |                  |     |     |     |     |     |                | ✓        | ✓                    | ✓ | ✓ | ✓ | ✓ | ✓                                    | ✓ |
| Berg Balance Scale score                                                   |          |                                     |   |   |   |   |   |                  |     |     |     |     |     |                | ✓        |                      |   |   |   | ✓ |                                      | ✓ |
| Leg score on Fugl-Meyer Assessment                                         |          |                                     |   |   |   |   |   |                  |     |     |     |     |     |                | ✓        |                      |   |   |   | ✓ |                                      | ✓ |

<sup>a</sup> • • : shows the transition of time.

<sup>b</sup>X: represents the day when the recovery of MWS is determined to be stagnant. Therefore, X-1 is the day before the day determined to be stagnant, and so on for X-2, X-3, etc.
